# Supplementary material for: Rational Protein Engineering of Bacterial N-demethylases to Create Biocatalysts for the Production of Methylxanthines
Source: bioRxiv or medRxiv preprint supplement (doi:10.1101/2021.12.17.472166), 2021-12-18
Supplement: Supplementary file [file media-1.pdf]

**Supplementary Information for**  
**Rational Protein Engineering of Bacterial *N*-demethylases to Create Biocatalysts for the Production of Methylxanthines**

Shelby Brooks Mills, Meredith B Mock and Ryan M. Summers\*

Chemical and Biological Engineering, The University of Alabama, Tuscaloosa, AL, USA

**Table S1.** All plasmids created and tested in this study.

| <b>Plasmid Name</b> | <b>Plasmid Characteristics</b>                                                       | <b>Source</b>                     |
|---------------------|--------------------------------------------------------------------------------------|-----------------------------------|
| pACYCDuet-1         | P15A origin, two MCS, hexahistidine tag sequence by MCS1, Chloramphenicol resistance | Novagen                           |
| pETDuet-1           | pBR322 origin, two MCS, hexahistidine tag sequence by MCS1, Ampicillin resistance    | Novagen                           |
| dDA                 | pACYCDuet-1 with NdmD and NdmA                                                       | (Algharrawi et al. 2015)          |
| dDB                 | pACYCDuet-1 with NdmD and NdmB                                                       | (Algharrawi and Subramanian 2020) |
| dAA                 | pACYCDuet-1 with two copies of NdmA                                                  | (Algharrawi et al. 2015)          |
| dBB                 | pACYCDuet-1 with two copies of NdmB                                                  | (Algharrawi and Subramanian 2020) |
| dDA1                | pACYCDuet-1 with NdmD and with NdmA mutation N282Q                                   | This work                         |
| dDA2                | pACYCDuet-1 with NdmD and with NdmA mutation F286L                                   | This work                         |
| dDA3                | pACYCDuet-1 with NdmD and with NdmA mutations N282Q and F286L                        | This work                         |
| dDB1                | pACYCDuet-1 with NdmD and with NdmB mutation L293F                                   | This work                         |
| dDB2                | pACYCDuet-1 with NdmD and with NdmB mutation Q289N                                   | This work                         |
| dDB3                | pACYCDuet-1 with NdmD and with NdmB mutations L293F and A289N                        | This work                         |
| pETDuet-NdmA4       | pETDuet-1 with NdmA4                                                                 | (Kim et al. 2019)                 |
| dDA4                | pACYCDuet-1 with NdmD and NdmA4                                                      | This work                         |
| pET-28 a (+)        | pBR322 origin, Kanamycin resistance                                                  | Novagen                           |
| pD                  | pET-28 a (+) with NdmD (previously named pET28-His-ndmD)                             | (Summers et al. 2012)             |
| pD1                 | pET-28 a (+) with NdmD mutation C69A                                                 | This work                         |
| pD2                 | pET-28 a (+) with NdmD mutations C69A and C50A                                       | This work                         |
| pDW1                | pET-28 a (+) with NdmD mutations C69A and V541W                                      | This work                         |
| pDW2                | pET-28 a (+) with NdmD mutations C69A, C50A and V541W                                | This work                         |
| pDR1                | pET-28 a (+) with NdmD mutations C69A and V541R                                      | This work                         |
| pDR2                | pET-28 a (+) with NdmD mutations C69A, C50A and V541R                                | This work                         |

**Table S2.** All primer sequences used in the plasmid construction for this study

| <b>Primer Name</b> | <b>Primer Sequence 5' to 3'</b>                   |
|--------------------|---------------------------------------------------|
| A-N282Q-F          | GATTATCTGCACATTGCATTTCAAGATCTCGTCTTCGCTGAAGAC     |
| A-N282Q-R          | GTCTTCAGCGAAGACGAGATCTTGAAATGCAATGTGCAGATAATC     |
| A-F286L-F          | GCATTTAATGATCTCGTCTTGGCTGAAGACAAACCAGTAATTG       |
| A-F286L-R          | CAATTACTGGTTTGTCTTCAGCCAAGACGAGATCATTAAATGC       |
| A3-N282Q-F         | GATTATCTGCACATTGCATTTCAAGATCTCGTCTTGGCTGAAGAC     |
| A3-N282Q-R         | GTCTTCAGCCAAGACGAGATCTTGAAATGCAATGTGCAGATAATC     |
| B-L293F-F          | GCTTTCCAGAAGCGGGTGTGTTGACGAAGACCAGCCTG            |
| B-L293F-R          | CAGGCTGGTCTTCGTCAAACACCCGCTTCTGGAAAGC             |
| B-Q289N-F          | CACATGCACCTGGCTTTCAACAAGCGGGTGCTTGACGAAG          |
| B-Q289N-R          | CTTCGTCAAAGCACCCGCTTGTTGAAAGCCAGGTGCATGTG         |
| B3-Q298N-F1        | CACATGCACCTGGCTTTCAACAAGCGGGTGTTTGACGAAG          |
| B3-Q289N-R1        | CTTCGTCAAACACCCGCTTGTTGAAAGCCAGGTGCATGTG          |
| D-V541W-F          | GAAGCTTCTTGTGAGCAGGGTTGGTGCGGGACTTGTATAACTCCAG    |
| D-V541W-R          | CTGGAGTTATACAAGTCCCGCACCAACCCTGCTCACAAGAAGCTTC    |
| D-V541R-F          | GAAGCTTCTTGTGAGCAGGGTCGCTGCGGGACTTGTATAACTCCAG    |
| D-V541R-R          | CTGGAGTTATACAAGTCCCGCAGCGACCCTGCTCACAAGAAGCTTC    |
| D-C50A-F           | AATGCTTGGGAGAACCGCGCCCCGCATAGAGGATTGCGG           |
| D-C50A-R           | CCGCAATCCTCTATGCGGGGCGCGGTTCTCCCAAGCATT           |
| D-C69A-F           | GCTAATACCGGTAACGAGTTGCGAGCTCAGTATCATGGATGGACTTATG |
| D-C69A-R           | CATAAGTCCATCCATGATACTGAGCTCGCAACTCGTTACCGGTATTAGC |
| Loop-F-NdeI        | GCACGGCATATGGAACAGGCAATCATTAAATG                  |
| NdmA-R-KpnI        | CCTCCGGGTACCTTATARGTAGCTCCTATCGCTT                |

**Table S3.** All strains created and tested in this study.

| <b>Strain Name</b>       | <b>Strain Characteristics</b>                                                                                               | <b>Source</b>                     |
|--------------------------|-----------------------------------------------------------------------------------------------------------------------------|-----------------------------------|
| <i>E. coli</i> BL21(DE3) | F <sup>-</sup> <i>ompT hsdS<sub>B</sub></i> (r <sub>B</sub> <sup>-</sup> m <sub>B</sub> <sup>-</sup> ) <i>gal dcm</i> (DE3) | Invitrogen                        |
| <i>E. coli</i> dDA       | BL21(DE3) dDA                                                                                                               | (Algharrawi et al. 2015)          |
| <i>E. coli</i> dDA1      | BL21(DE3) dDA1                                                                                                              | This work                         |
| <i>E. coli</i> dDA2      | BL21(DE3) dDA2                                                                                                              | This work                         |
| <i>E. coli</i> dDA3      | BL21(DE3) dDA3                                                                                                              | This work                         |
| <i>E. coli</i> dDA4      | BL21(DE3) dDA4                                                                                                              | This work                         |
| <i>E. coli</i> dDB       | BL21(DE3) dDB                                                                                                               | (Algharrawi and Subramanian 2020) |
| <i>E. coli</i> dDB1      | BL21(DE3) dDB1                                                                                                              | This work                         |
| <i>E. coli</i> dDB2      | BL21(DE3) dDB2                                                                                                              | This work                         |
| <i>E. coli</i> dDB3      | BL21(DE3) dDB3                                                                                                              | This work                         |
| <i>E. coli</i> pDdAA     | BL21(DE3) pD dAA                                                                                                            | (Algharrawi et al. 2015)          |
| <i>E. coli</i> pD1dA     | BL21(DE3) pD1 dAA                                                                                                           | This work                         |
| <i>E. coli</i> pD2dAA    | BL21(DE3) pD2 dAA                                                                                                           | This work                         |
| <i>E. coli</i> pDWdAA    | BL21(DE3) pDW dAA                                                                                                           | This work                         |
| <i>E. coli</i> pDW1dAA   | BL21(DE3) pDW1 dAA                                                                                                          | This work                         |
| <i>E. coli</i> pDW2dAA   | BL21(DE3) pDW2 dAA                                                                                                          | This work                         |
| <i>E. coli</i> pDRdAA    | BL21(DE3) pDR dAA                                                                                                           | This work                         |
| <i>E. coli</i> pDR1dAA   | BL21(DE3) pDR1 dAA                                                                                                          | This work                         |
| <i>E. coli</i> pDR2dAA   | BL21(DE3) pDR2 dAA                                                                                                          | This work                         |
| <i>E. coli</i> pD1dBB    | BL21(DE3) pD1 dBB                                                                                                           | This work                         |
| <i>E. coli</i> pD2dBB    | BL21(DE3) pD2 dBB                                                                                                           | This work                         |
| <i>E. coli</i> pDWdBB    | BL21(DE3) pDW dBB                                                                                                           | This work                         |
| <i>E. coli</i> pDW1dBB   | BL21(DE3) pDW1 dBB                                                                                                          | This work                         |
| <i>E. coli</i> pDW2dBB   | BL21(DE3) pDW2 dBB                                                                                                          | This work                         |
| <i>E. coli</i> pDRdBB    | BL21(DE3) pDR dBB                                                                                                           | This work                         |
| <i>E. coli</i> pDR1dBB   | BL21(DE3) pDR1 dBB                                                                                                          | This work                         |
| <i>E. coli</i> pDR2dBB   | BL21(DE3) pDR2 dBB                                                                                                          | This work                         |

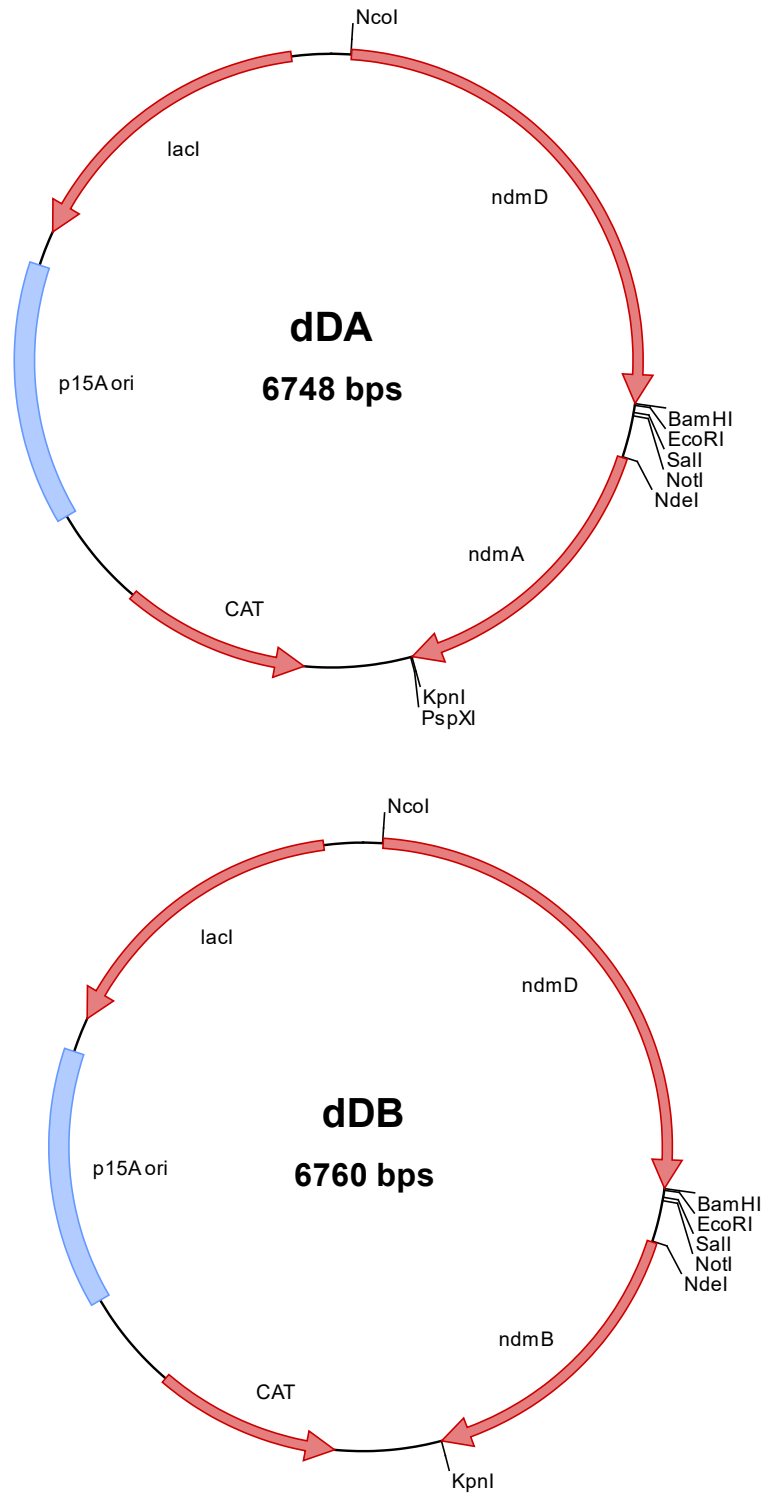

**Fig. S1** Plasmid maps of dDA and dDB, which served as the basis for all further plasmids created in this work.

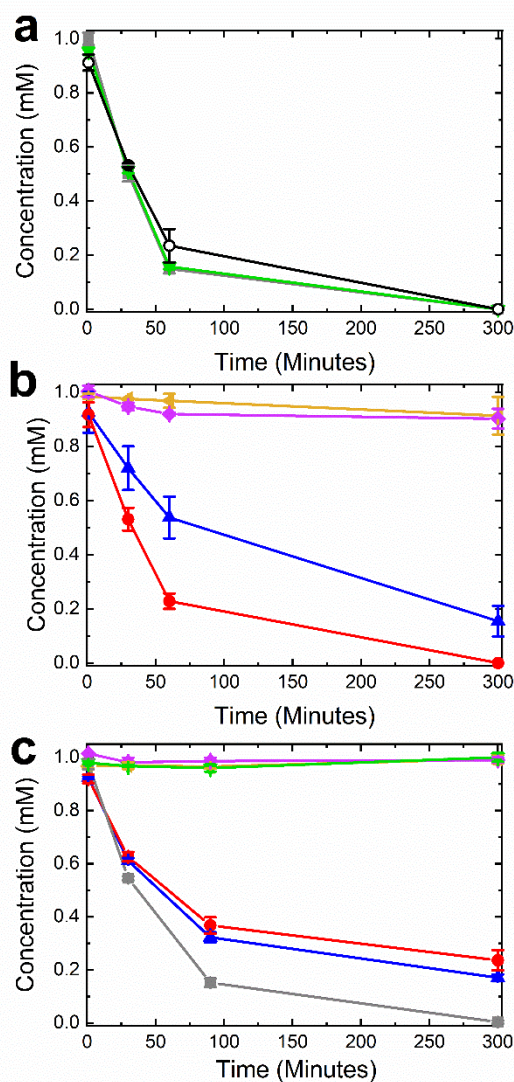

**Fig. S2** Substrate conversion by whole cells expressing *ndmA* or *ndmB* with various *ndmD* mutants show varying levels of activity. Caffeine is converted to theobromine by cells expressing *ndmA* with (a)  $\circ$ , *ndmD*,  $\blacksquare$ , *ndmD1* and  $\bullet$ , *ndmD2*, or (b)  $\blacktriangle$ , *ndmDW1*,  $\blacktriangleleft$ , *ndmDW2*,  $\bullet$ , *ndmDR1*, and  $\blacklozenge$ , *ndmDR2*. (c) Theobromine is converted to 7-methylxanthine by cells expressing *ndmB* with  $\blacksquare$ , *ndmD1*,  $\blacktriangle$ , *ndmDW1*,  $\bullet$ , *ndmDR1*,  $\blacktriangledown$ , *ndmD2*,  $\blacktriangleleft$ , *ndmDW2* and  $\blacklozenge$ , *ndmDR2*. Cells ( $OD_{600} = 5.0$ ) were incubated with 1 mM caffeine or theobromine in 50 mM  $KP_i$  buffer at 30°C with 200 rpm shaking, and metabolites were quantified by HPLC. Concentrations reported are means with standard deviations of triplicate results.
